# Supplementary material for: Development of a Novel Hybprinter-SAM for Functionally Graded Tissue Engineering Constructs with Patterned and Localized Biochemical Signals
Source: Research Square preprint supplement (doi:10.21203/rs.3.rs-5898561/v1), 2025-02-07
Supplement: Supplementary file 1 [file e9a8eba650c628b5a9acc95a.xlsx]

## Sheet: Rheology
Temperature	Storage modulus			Loss modulus
	Pa	Pa	Pa	Pa	Pa	Pa
11.18	4176.62	5064.9	4176.62	57.0572	68.2868	57.0572
11.57	4167.45	5064.67	4167.45	56.818	65.453	56.818
11.69	4173.96	5061.84	4173.96	57.6444	65.1033	57.6444
11.74	4174.24	5053.23	4174.24	56.5973	67.5102	56.5973
11.78	4172.12	5041.4	4172.12	55.9094	66.9043	55.9094
11.84	4169.44	5028.33	4169.44	56.8941	65.5058	56.8941
11.93	4165.32	5015.79	4165.32	56.8167	66.256	56.8167
12.19	4165.58	4997.25	4165.58	58.306	65.4063	58.306
12.38	4157.45	4980.65	4157.45	55.6073	65.3334	55.6073
12.79	4144.99	4961.95	4144.99	56.216	65.3049	56.216
13.06	4135.74	4943.18	4135.74	56.6207	65.6069	56.6207
13.34	4126.65	4923.41	4126.65	57.6599	63.5209	57.6599
13.63	4118.16	4901.35	4118.16	58.4869	66.898	58.4869
13.93	4103.52	4872.54	4103.52	55.5429	66.738	55.5429
14.22	4087.72	4851.71	4087.72	54.9695	64.9598	54.9695
14.52	4076.52	4827.77	4076.52	57.5824	63.1742	57.5824
15.05	4047.89	4801.34	4047.89	57.2559	64.5812	57.2559
15.33	4024.93	4775.64	4024.93	56.2732	62.9337	56.2732
15.6	4006.59	4747.26	4006.59	56.4013	63.7223	56.4013
15.88	3985.54	4718.08	3985.54	55.6672	64.6253	55.6672
16.18	3958.55	4687.13	3958.55	56.4603	65.0111	56.4603
16.45	3933.47	4653.98	3933.47	55.9228	63.8804	55.9228
16.71	3906.65	4619.42	3906.65	54.0312	62.9705	54.0312
16.98	3880.04	4582.78	3880.04	54.9533	61.701	54.9533
17.24	3849.3	4544.85	3849.3	55.9033	62.5411	55.9033
17.5	3817.71	4501.52	3817.71	54.0087	65.2358	54.0087
17.77	3784.34	4461.58	3784.34	54.865	62.1839	54.865
18.04	3748.18	4415.93	3748.18	53.6405	63.1714	53.6405
18.3	3716.36	4371.94	3716.36	54.4095	62.9699	54.4095
18.57	3677.66	4298.04	3677.66	53.7347	59.5097	53.7347
18.83	3639.15	4246.61	3639.15	53.0253	60.6529	53.0253
19.1	3599.6	4194.76	3599.6	53.0658	60.5632	53.0658
19.36	3559.52	4140.35	3559.52	52.6944	61.0639	52.6944
19.63	3515.26	4084.37	3515.26	52.751	59.528	52.751
19.97	3458.34	4026.02	3458.34	51.8286	57.7857	51.8286
20.24	3412.19	3965.08	3412.19	51.8668	59.6621	51.8668
20.5	3364.35	3849.37	3364.35	51.9737	55.749	51.9737
20.77	3314.54	3783.82	3314.54	51.6225	55.0946	51.6225
21.03	3255.64	3713.73	3255.64	49.4534	57.5985	49.4534
21.3	3203.96	3646.19	3203.96	50.0677	58.3199	50.0677
21.57	3150.13	3579.23	3150.13	49.7522	55.6976	49.7522
21.84	3095.27	3507.47	3095.27	49.3134	55.0926	49.3134
22.1	3039.8	3433.32	3039.8	49.1951	52.1743	49.1951
22.61	2929.01	3356.09	2929.01	46.8968	53.7084	46.8968
22.87	2869.72	3279.38	2869.72	48.4897	50.4332	48.4897
23.14	2807.17	3192.83	2807.17	48.0029	51.5634	48.0029
23.41	2745.65	3112.1	2745.65	47.2374	48.1714	47.2374
23.68	2681.51	3033.11	2681.51	44.8601	49.392	44.8601
23.95	2616.52	2950.66	2616.52	45.4988	50.7652	45.4988
24.23	2550.91	2869.34	2550.91	44.4931	46.5655	44.4931
24.54	2482.91	2785.55	2482.91	44.2626	47.7703	44.2626
24.83	2415.62	2701.25	2415.62	42.3213	46.6884	42.3213
25.11	2348.72	2617.27	2348.72	41.267	45.3994	41.267
25.38	2278.96	2528.09	2278.96	42.8124	43.5469	42.8124
25.65	2211.41	2445.62	2211.41	40.5633	42.0024	40.5633
25.92	2143.61	2357.22	2143.61	39.6975	42.5066	39.6975
26.18	2076.06	2276.73	2076.06	38.5674	42.9113	38.5674
26.45	2006.8	2187.39	2006.8	38.8172	39.9101	38.8172
26.72	1940.28	2106.67	1940.28	38.3523	38.4499	38.3523
26.99	1871.44	2032.1	1871.44	36.6315	37.9525	36.6315
27.26	1806.62	1952.99	1806.62	38.0458	37.8573	38.0458
27.52	1739.76	1875.78	1739.76	35.858	39.0404	35.858
27.79	1676.58	1767.16	1676.58	36.9421	35.0133	36.9421
28.06	1616.4	1720.3	1616.4	34.9882	31.4959	34.9882
28.32	1551.48	1658.98	1551.48	32.1434	42.665	32.1434
28.58	1492.23	1564.34	1492.23	34.5884	34.7008	34.5884
28.85	1437.14	1491.97	1437.14	33.9345	33.6464	33.9345
29.12	1380.46	1383.07	1380.46	30.6927	43.6596	30.6927
29.38	1320.68	1228.01	1320.68	30.1202	23.8847	30.1202
29.66	1266.48	1214.04	1266.48	30.924	31.4962	30.924
29.92	1210.31	1124.16	1210.31	29.9715	27.2734	29.9715
30.19	1161.98	1065.18	1161.98	29.1779	30.4577	29.1779
30.45	1105.52	985.608	1105.52	28.4393	27.2383	28.4393
30.72	1053.19	900.991	1053.19	29.177	24.8222	29.177
30.99	1003.17	838.799	1003.17	28.9715	28.468	28.9715
31.26	941.449	769.896	941.449	26.3281	27.1604	26.3281
31.52	886.378	700.613	886.378	24.648	24.7212	24.648
31.78	833.499	625.265	833.499	25.7103	21.3468	25.7103
32.05	780.567	558.992	780.567	24.3817	21.5989	24.3817
32.32	720.601	479.319	720.601	24.3529	19.9033	24.3529
32.58	672.955	435.883	672.955	25.2936	20.903	25.2936
32.85	616.711	378.991	616.711	25.9346	19.9318	25.9346
33.12	552.854	325.686	552.854	22.8907	21.1033	22.8907
33.38	500.125	257.28	500.125	25.0397	14.0718	25.0397
33.65	434.806	211.119	434.806	21.9031	19.3406	21.9031
33.91	369.888	164.968	369.888	19.7322	15.2285	19.7322
34.18	311.917	123.916	311.917	19.2457	15.4692	19.2457
34.45	258.445	91.6044	258.445	18.8113	14.7437	18.8113
34.72	206.335	67.0649	206.335	18.5175	13.1087	18.5175
34.98	150.804	38.8053	150.804	14.8008	11.2111	14.8008
35.25	110.147	26.581	110.147	15.6611	10.8485	15.6611
35.51	77.0684	16.5327	77.0684	11.8163	6.52739	11.8163
35.77	52.9508	8.70931	52.9508	12.9245	4.25224	12.9245
36.05	38.7816	5.8004	38.7816	10.9168	5.61987	10.9168
36.32	24.9896	4.09731	24.9896	9.33829	2.78501	9.33829
36.58	14.1981		14.1981	7.09173		7.09173
36.85	8.55597		8.55597	5.0437		5.0437
37.11	6.26136		6.26136	5.46242		5.46242

## Sheet: Shear thinning
Shear rate (1/s)	Viscosity (Pa·s)
19.7981	102.589	82.3514	104.043	101.654	92.3697
19.6479	107.404	86.2819	113.749	103.986	91.2863
19.4992	105.941	85.7426	115.233	103.545	85.2833
19.3516	103.877	86.0763	113.47	104.372	80.4624
19.2054	101.412	84.7358	113.435	105.239	73.8575
19.0599	101.375	86.6731	114.794	103.832	70.8856
18.9158	96.9569	90.0656	115.919	102.969	72.4368
18.7728	97.3181	92.6707	115.168	100.839	71.8134
18.6308	97.8184	93.4421	112.484	99.7996	73.3167
18.49	99.7173	95.003	110.02	103.035	70.013
18.3498	103.338	93.7947	107.072	104.29	68.6741
18.2106	105.049	92.301	106.298	106.01	65.6892
18.0725	107.274	91.0523	106.654	105.216	65.5857
17.9354	107.632	89.3675	107.841	104.715	63.3882
17.8001	109.801	91.5851	107.352	104.902	59.4941
17.6653	111.619	90.9684	105.696	102.117	58.4472
17.5316	110.237	89.9455	104.79	100.268	61.3109
17.3982	110.189	88.566	103.159	99.2788	64.7696
17.2668	109.466	88.8224	103.118	99.3528	65.7405
17.1365	108.106	88.9438	101.783	95.0291	65.9076
17.0065	106.589	89.7701	103.781	96.3575	64.2956
16.8776	105.789	91.3131	103.972	95.5082	64.2008
16.7503	106.095	91.2103	104.005	94.1407	63.3447
16.624	108.183	91.3784	102.793	95.5386	63.1533
16.4975	109.845	89.1158	101.856	95.2586	64.8909
16.3724	112.665	89.543	101.277	91.6929	67.0749
16.2484	112.854	89.7667	101.427	90.3649	67.9938
16.1252	109.456	90.4039	102.02	91.8585	68.7586
16.0032	107.709	88.7517	101.325	91.6808	69.7119
15.8816	106.007	85.8903	100.597	93.764	70.7384
15.7618	105.239	83.8967	101.352	97.0439	71.9506
15.6423	103.068	79.2148	101.678	99.0419	71.1068
15.5239	101.664	79.595	101.485	100.901	67.436
15.4065	102.103	83.2096	99.291	102.863	65.3883
15.2898	101.236	86.8193	97.3078	103.453	64.6099
15.1736	98.8463	88.9304	97.328	102.963	64.1594
15.0589	98.9591	91.9888	98.5193	104.093	63.2497
14.9448	99.0535	90.0136	98.8592	102.325	60.6911
14.8318	99.5014	88.8357	99.31	100.58	59.1305
14.7194	98.2324	88.1535	97.7192	97.1834	59.6051
14.6081	96.8413	87.3874	98.139	97.4573	63.1033
14.4975	94.1492	86.6752	98.3483	98.8162	64.6195
14.3878	94.753	86.4967	99.059	98.6455	65.2445
14.2791	96.6945	87.1685	99.8315	98.8604	62.8997
14.1705	100.25	87.67	100.532	100.919	60.5447
14.0633	103.535	88.1309	101.113	103.444	60.6646
13.9567	104.021	87.7107	102.657	103.48	62.379
13.851	105.442	88.0966	103.391	103.684	63.0731
13.7458	105.221	90.1133	104.839	103.169	64.2689
13.6422	104.498	91.814	104.76	101.428	64.3537
13.5389	101.628	93.4268	104.956	94.9132	61.544
13.4363	100.532	93.4279	104.18	94.4714	60.238
13.3345	100.84	91.9319	102.721	95.2427	61.3164
13.2336	101.866	91.7562	102.465	96.3964	63.6722
13.1336	103.465	93.8753	101.821	97.2107	63.125
13.0343	105.678	95.3258	102.885	96.8613	62.4123
12.9357	106.186	95.7366	101.212	97.2854	62.7008
12.8369	106.781	95.3969	100.668	97.8569	63.5541
12.739	108.225	95.6482	99.6545	98.5486	64.4647
12.644	109.497	92.6573	101.042	98.7651	66.9664
12.5487	109.001	91.2504	102.899	99.1742	70.4951
12.4533	106.615	90.5313	103.895	99.3438	71.7039
12.359	106.575	89.1468	103.582	98.7329	71.3679
12.2653	103.668	90.0966	102.398	98.6991	70.752
12.1723	102.339	89.0062	101.129	98.4829	70.1242
12.08	103.211	90.2735	99.3154	95.3918	70.7782
11.9884	103.093	90.6873	98.2812	92.4553	72.6418
11.8975	102.698	91.5113	94.1449	91.6329	75.0065
11.8072	101.338	92.4238	91.1177	92.1532	76.5368
11.7184	100.89	93.5661	88.0362	92.8905	76.1747
11.6296	101.012	94.5507	87.4271	94.8781	75.8529
11.542	103.305	94.8552	87.5237	94.7331	75.0854
11.4544	100.278	95.9628	88.3234	95.9195	70.2056
11.3677	101.046	96.7203	88.0802	96.5149	67.0453
11.2817	102.055	97.6683	86.6549	96.8985	65.9096
11.1962	103.271	96.9098	91.541	96.7442	67.2398
11.1114	103.685	95.4305	94.5662	97.3807	67.8806
11.0271	104.568	93.782	98.1929	97.2151	69.3392
10.9432	107.327	93.0365	100.692	96.3872	70.3521
10.8596	110.11	93.0983	103.592	96.5156	68.5626
10.7768	114.03	93.8005	104.255	95.9983	68.3099
10.6967	114.887	95.9267	104.574	97.738	68.8747
10.6158	114.57	96.702	105.727	97.8094	69.2678
10.5355	113.103	96.8	104.52	98.0328	69.5008
10.4557	109.223	95.6426	103.261	99.0681	69.9926
10.3766	108.656	94.9962	101.59	98.8695	68.4496
10.2987	107.144	95.8303	103.357	98.6934	67.4838
10.2207	107.236	95.6772	103.667	96.7669	66.6714
10.1433	106.099	94.5003	105.28	97.2489	66.1168
10.066	106.788	93.5859	106.508	96.5475	65.2521
9.9898	106.915	94.4401	108.272	96.9064	67.0298
9.91415	108.9	94.6853	109.101	96.7663	70.2679
9.83899	108.232	95.5148	107.618	97.2335	70.3306
9.76437	109.697	95.7973	106.457	95.2892	70.9323
9.69046	109.183	96.7079	99.7178	94.7314	70.9654
9.6172	109.395	96.8976	100.875	94.7726	71.6503
9.5444	109.525	98.9204	100.476	95.9521	71.3894
9.47217	110.057	100.329	101.839	98.3781	71.3683
9.40044	108.613	100.311	101.237	98.4374	72.636
9.32919	109.112	102.246	100.493	98.6285	74.8978
9.25839	112.109	102.565	97.7172	100.115	76.6724
9.18853	113.648	103.549	94.9798	101.485	77.33
9.11889	115.169	103.235	94.0603	100.512	78.8686
9.04995	114.804	104.074	92.1843	99.8673	79.4371
8.98134	115.509	103.875	92.6543	99.8732	80.6693
8.91341	114.578	104.764	92.8954	100.26	81.0892
8.84602	116.153	106.294	94.2852	100.718	83.9892
8.77921	116.021	105.4	94.6225	101.028	82.2351
8.71263	117.061	106.311	97.7826	101.327	83.0533
8.64654	118.715	105.853	100.299	101.762	83.2434
8.581	117.874	107.907	101.649	102.136	81.076
8.51625	116.173	108.152	103.56	99.7458	81.5863
8.45156	114.885	109.393	104.515	101.075	82.3317
8.38785	116.329	109.088	106.682	101.779	84.4339
8.32428	117.043	108.974	105.499	102.41	85.6335
8.26121	117.674	110.272	105.945	103.422	87.2233
8.19855	117.862	110.024	106.029	105.619	87.0322
8.13665	117.482	110.386	104.419	107.333	87.6981
8.07483	117.551	107.098	104.713	109.754	85.7031
8.01359	118.258	107.838	106.986	112.314	86.2102
7.95297	119.907	107.012	108.21	113.486	84.9705
7.89303	120.417	107.937	107.403	110.979	85.3288
7.83297	122.31	108.557	108.068	109.302	86.2779
7.7736	122.22	108.406	107.889	108.914	87.1852
7.71468	122.642	108.506	108.143	110.102	87.0962
7.65644	122.092	107.507	106.982	110.027	88.2354
7.59815	122.132	109.054	106.014	108.148	88.1264
7.54045	121.058	108.766	103.656	108.944	88.6547
7.48359	120.996	111.691	103.838	108.716	90.1779
7.42712	119.346	111.928	104.346	109.487	91.9836
7.37084	117.372	113.912	105.667	112.019	94.7199
7.31496	116.559	114.976	104.96	112.64	95.5282
7.25974	117.145	115.729	105.702	113.959	97.8782
7.20466	117.611	117.584	108.547	113.391	98.3739
7.15009	118.218	115.038	110.003	113.891	97.5833
7.09605	119.998	117.148	110.102	114.641	95.379
7.04253	120.956	117.359	109.432	115.808	94.6699
6.98903	123.885	120.158	107.943	117.358	91.4074
6.93609	125.19	120.403	106.951	117.875	93.3326
6.88345	128.417	122.337	108.001	118.245	95.2214
6.83135	129.616	122.246	108.497	116.94	97.5438
6.77973	131.036	122.519	110.008	116.906	99.1833
6.72825	129.085	124.715	110.559	115.628	98.7005
6.67715	128.678	125.334	111.536	116.276	100.382
6.62651	128.627	127.497	112.586	115.946	101.068
6.57643	129.153	126.495	112.834	115.915	103.917
6.52687	128.718	128.816	112.107	116.526	103.707
6.47731	129.375	129.424	111.32	116.817	104.366
6.42818	129.978	130.958	112.968	120.08	101.655
6.37951	129.559	131.482	114.153	121.572	103.22
6.33104	130.642	132.023	116.836	125.157	103.729
6.28315	129.779	133.448	117.879	125.03	104.584
6.23582	129.256	132.196	119.808	125.883	106.463
6.18842	128	133.473	121.403	126.886	107.818
6.14175	129.663	131.652	121.983	127.331	110.146
6.09505	129.434	132.806	121.429	128.686	110.121
6.04914	129.426	132.482	121.795	128.992	112.779
6.00326	130.663	133.497	123.001	130.36	114.286
5.95787	132.048	134.385	122.628	129.132	118.534
5.9129	133.159	134.848	124.594	130.417	120.087
5.8682	132.601	137.467	124.114	129.031	120.229
5.82368	133.673	137.457	125.928	130.748	117.696
5.77946	133.31	139.992	124.93	130.834	118.052
5.73575	133.289	139.851	126.409	131.191	113.719
5.69232	132.241	142.489	126.955	131.448	112.336
5.64935	135.01	142.776	127.279	132.322	112.355
5.60647	136.414	143.966	128.468	134.514	111.673
5.56391	137.585	145.38	127.879	133.729	113.253
5.52199	137.662	145.918	130.935	135.776	113.374
5.48004	137.245	147.996	131.523	135.089	115.864
5.43831	138.96	148.128	134.691	137.12	116.577
5.39735	138.068	150.353	133.746	138.133	118.85
5.35644	139.905	150.17	135.603	139.6	119.453
5.3157	138.441	152.387	135.216	141.77	120.918
5.2755	140.63	152.529	135.42	142.243	122.893
5.23573	139.958	153.908	136.74	145.546	123.906
5.19594	141.6	154.899	137.417	144.955	125.217
5.15683	140.67	155.943	139.501	146.203	125.125
5.11774	140.229	156.612	138.213	145.735	126.676
5.07893	141.646	154.705	139.332	148.181	123.918
5.04051	141.968	155.61	137.351	149.153	124.004
5.00223	144.197	154.903	139.461	149.37	124.08
4.96423	143.655	156.818	139.959	150.926	126.248
4.92657	146.539	156.974	142.027	150.201	127.263
4.88951	145.614	158.818	142.977	150.982	127.289
4.85252	148.569	159.926	143.349	149.624	126.844
4.81568	146.836	160.466	145.912	150.923	128.427
4.77927	148.554	162.371	145.33	149.78	128.471
4.74299	149.837	164.056	148.066	153.061	128.565
4.7071	151.603	166.607	146.597	154.568	129.333
4.67149	153.799	167.245	150.027	155.882	128.412
4.63619	154.566	170.154	150.933	159.473	127.803
4.60096	158.179	170.762	154.196	160.267	126.88
4.5661	159.027	171.926	154.39	163.794	128.613
4.53165	161.149	172.547	154.094	162.655	129.636
4.49727	160.847	172.776	154.127	165.21	132.28
4.46324	162.525	172.442	153.363	163.995	132.997
4.4294	161.374	171.629	155.95	162.214	134.661
4.39568	163.657	171.023	154.391	162.683	134.7
4.36271	165.314	169.969	155.824	162.856	136.633
4.32946	167.033	171.434	153.359	165.112	137.453
4.2966	169.524	172.038	155.013	163.898	138.978
4.26413	170.358	174.305	153.572	167.906	138.64
4.23197	172.756	175.007	148.983	166.972	138.582
4.19982	169.614	176.651	149.28	169.545	139.772
4.16794	168.523	176.841	148.651	168.846	138.694
4.13662	167.613	178.428	151.989	170.981	139.299
4.10534	170.096	178.056	151.547	172.722	138.539
4.07427	170.132	178.288	155.626	172.919	138.875
4.04332	170.238	177.249	155.709	176.044	137.092
4.01264	169.634	176.403	158.37	174.3	137.346
3.98219	169.562	176.094	158.269	176.651	136.605
3.95206	170.029	174.552	160.611	172.543	137.666
3.92204	169.851	175.352	162.966	173.336	137.775
3.89245	168.991	173.196	164.469	173.097	137.672
3.86303	167.401	175.558	167.845	174.81	139.038
3.83356	166.282	173.45	168.07	176.581	139.263
3.80476	164.051	173.533	171.356	175.846	142.069
3.77605	164.813	174.261	169.624	178.442	141.791
3.74725	165.694	176.336	172.348	178.155	143.778
3.71909	168.285	178.301	171.398	183.744	142.225
3.6907	169.059	178.431	173.72	184.088	144.471
3.66303	172.941	180.977	174.83	188.399	144.681
3.63495	172.5	180.98	174.833	189.514	146.45
3.60759	175.533	184.05	175.509	191.762	147.528
3.58043	177.072	182.327	174.658	193.908	148.265
3.55354	178.514	184.359	176.05	195.085	150.309
3.52644	179.714	184.15	174.998	198.751	148.192
3.4997	179.59	185.656	174.844	198.434	148.58
3.47305	180.749	186.248	173.682	202.25	147.935
3.44678	179.852	186.559	174.68	201.808	151.336
3.42084	182.837	189.045	175.962	202.461	150.803
3.3949	182.986	186.822	178.682	199.393	153.341
3.36915	186.477	189.369	179.747	199.8	153.607
3.34355	185.662	187.212	181.238	201.344	155.358
3.31817	189.33	189.316	185.402	201.194	155.87
3.29311	188.698	187.713	188.73	204.506	155.472
3.26824	182.225	188.285	192.927	203.049	157.232
3.24344	181.644	189.544	193.555	206.13	155.773
3.21885	183.085	189.108	194.851	203.183	157.52
3.19453	183.312	191.736	194.856	202.981	154.709
3.1702	184.649	190.386	197.219	197.969	154.545
3.1462	186.824	195.511	197.852	198.201	151.034
3.1225	185.888	194.514	199.039	199.665	152.509
3.09903	188.163	197.796	199.607	198.102	153.2
3.07543	187.157	197.224	200.407	200.13	155.186
3.05198	191.659	199.047	201.516	198.288	156.951
3.02898	192.487	200.261	201.655	202.75	157.002
3.00624	194.273	199.048	203.437	201.708	160.495
2.98323	195.247	201.172	203.929	205.815	160.778
2.96064	195.787	199.121	205.962	207.246	164.999
2.93839	198.707	202.757	205.791	208.557	163.768
2.91568	197.116	201.045	208.543	210.549	164.744
2.89414	199.963	204.845	208.989	210.445	162.408
2.87167	199.229	203.726	211.647	213.756	164.649
2.85043	204.476	205.692	211.643	212.731	165.322
2.82849	204.087	206.917	214.19	215.965	166.697
2.80748	206.557	206.564	215.599	215.435	169.41
2.78589	206.82	209.857	217.836	218.791	169.007
2.765	209.141	207.492	220.531	219.815	169.971
2.74412	210.712	211.082	221.19	220.6	168.73
2.723	207.453	208.387	224.779	223.319	171.837
2.7026	210.757	210.902	224.526	223.432	171.367
2.68242	211.701	208.668	227.856	226.374	174.458
2.66175	215.286	209.873	226.176	224.285	174.709
2.64155	214.607	209.584	228.597	227.249	176.952
2.62158	219.563	208.946	226.605	226.152	178.782
2.60185	218.644	212.355	228.249	228.137	179.658
2.58233	220.529	210.426	228.746	228.021	182.701
2.56253	221.192	215.548	227.703	227.64	182.357
2.54302	223.444	214.146	229.697	225.676	185.32
2.52371	225.104	218.706	228.982	223.88	183.236
2.50479	224.54	219.739	234.251	226.268	182.14
2.48582	229.879	221.974	233.278	225.727	179.21
2.46701	225.814	225.165	238.934	229.701	181.545
2.44837	231.892	224.653	238.698	229.763	181.468
2.42983	231.545	229.452	244.239	231.976	182.628
2.41148	236.264	226.134	246.874	233.311	181.687
2.39326	235.605	226.444	249.771	233.198	181.574
2.37518	238.94	222.15	253.692	235.26	184.048
2.35722	239.221	225.814	253.063	234.718	184.839
2.33921	238.601	225.637	258.659	237.72	187.507
2.32134	243.05	228.063	256.151	236.095	188.556
2.30392	240.944	230.572	263.097	239.182	192.177
2.28655	246.181	229.779	261.636	239.655	192.77
2.26928	243.556	234.502	266.359	242.558	197.31
2.25187	248.137	233.075	267.337	244.792	198.964
2.23471	246.352	238.193	271.872	246.788	202.576
2.21809	250.701	236.702	274.178	250.143	202.25
2.20137	250.6	239.662	274.245	251.522	206.614
2.18424	253.965	238.944	279.16	255.706	207.288
2.16822	255.975	240.271	277.595	256.335	210.166
2.15176	257.633	241.963	284.092	259.356	209.94
2.13495	259.329	240.043	282.151	261.357	213.454
2.11949	258.92	242.427	287.879	265.641	215.239
2.10271	261.307	239.151	286.338	267.27	216.532
2.08739	258.916	244.824	288.552	269.901	218.244
2.07118	260.397	244.043	288.286	272.907	219.075
2.05574	257.958	249.321	286.18	275.718	222.35
2.03998	259.8	250.223	288.404	278.878	222.06
2.02474	258.983	254.135	285.171	281.127	224.853
2.00911	261.731	256.304	290.395	285.849	225.13
1.99437	261.234	257.219	285.316	287.79	227.894
1.97874	263.101	261.854	289.961	292.608	227.367
1.96418	264.457	260.246	285.899	294.123	228.783
1.94902	266.902	265.517	288.154	298.343	229.586
1.93443	268.509	263.649	286.938	300.636	229.963
1.91997	269.716	268.77	286.88	302.692	233.16
1.90508	271.687	268.266	289.704	306.137	233.009
1.89078	271.51	271	287.147	307.451	237.232
1.87645	266.503	272.464	287.914	312.206	236.717
1.86209	260.301	273.061	282.465	312.743	242.205
1.84825	258.918	276.699	287.497	318.202	240.758
1.83406	258.508	275.12	285.109	318.076	245.962
1.82037	262.471	278.24	289.185	322.848	246.396
1.80657	261.856	275.841	287.269	324.796	250.922
1.7928	264.287	280.235	287.491	328.253	253.136
1.77927	264.27	279.44	289.487	330.222	254.42
1.76565	265.898	283.412	288.223	329.896	259.186
1.75239	265.562	284.993	293.444	329.62	259.243
1.73919	267.315	287.888	292.26	328.323	266.304
1.72597	271.175	290.478	298.527	333.456	265.707
1.71282	270.728	292.535	296.527	332.418	272.917
1.69988	275.703	295.376	303.559	337.691	271.626
1.687	273.663	295.505	304.04	335.583	277.564
1.67429	279.542	300.024	307.501	340.547	276.992
1.66158	277.557	301.135	309.231	342.641	280.084
1.649	283.675	305.814	310.09	345.28	281.85
1.63654	282.524	306.642	315.345	350.023	280.454
1.62416	286.453	310.045	313.63	351.241	277.255
1.61185	287.729	311.448	319.665	356.509	273.017
1.59963	289.454	315.747	317.904	355.181	279.787
1.58756	290.223	316.092	323.58	360.071	277.199
1.57555	290.3	318.451	322.244	359.058	282.981
1.56362	297.627	318.833	325.718	359.947	279.615
1.55164	292.417	319.495	326.324	359.124	283.34
1.53988	301.351	321.58	327.943	359.267	282.22
1.52824	297.161	320.172	331.979	362.201	284.079
1.51679	305.403	323.949	332.582	360.515	285.363
1.50521	302.736	321.676	338.583	366.726	276.989
1.49385	305.552	326.815	339.434	366.443	280.188
1.48266	307.227	326.896	345.631	373.102	277.873
1.47118	308.462	332.185	347.677	372.139	283.973
1.46017	314.208	332.714	352.638	372.87	281.046
1.44906	311.75	336.219	354.014	367.376	286.409
1.43835	320.26	340.378	358.401	365.824	284.509
1.42736	314.686	340.584	361.166	367.053	289.439
1.41635	324.619	345.602	364.478	362.62	290.173
1.40569	321.433	343.763	366.238	367.936	291.946
1.39536	328.524	350.888	368.336	363.865	294.037
1.38413	327.172	349.654	372.794	369.432	291.505
1.374	327.778	354.785	374.629	368.625	297.709
1.36396	327.949	354.433	377.981	370.209	294.848
1.35286	328.474	358.417	379.554	370.427	301.174
1.34311	335.171	360.607	383.32	369.259	298.242
1.33319	331.534	361.031	382.053	375.422	302.914
1.32236	339.286	366.32	383.573	372.052	302.512
1.31291	336.19	362.061	375.933	378.773	304.963
1.30278	343.7	368.38	378.707	373.792	306.152
1.2928	339.03	366.274	378.144	379.066	306.087
1.28347	341.715	373.12	379.237	378.807	309.807
1.27316	340.354	371.225	379.047	380.82	308.636
1.26402	343.444	374.295	380.076	383.995	313.762
1.25404	345.15	376.239	385.112	381.332	311.329
1.24476	342.947	375.158	383.917	390.386	315.015
1.23524	351.357	379.804	391.419	386.03	311.14
1.22592	348.311	375.101	389.751	396.261	315.799
1.2167	356.328	382.591	398.388	390.935	315.346
1.20747	351.984	379.07	395.337	397.478	319.339
1.19832	358.951	386.631	401.094	395.101	320.796
1.18938	355.843	385.352	401.02	394.956	323.206
1.18013	360.745	389.14	402.687	397.397	326.124
1.17149	363.046	391.965	406.553	392.487	327.664
1.16225	363.521	392.567	405.411	402.223	331.738
1.15378	366.925	399.889	412.964	399.59	331.928
1.14487	362.85	396.426	408.502	409.178	337.182
1.13614	369.797	405.591	417.723	406.705	337.821
1.12769	360.593	400.758	411.7	410.047	342.51
1.11898	368.756	410.916	418.554	412.491	342.71
1.11064	365.891	407.618	416.876	413.667	347.897
1.10232	374.006	409.897	421.452	420.979	347.084
1.09368	373.887	411.688	426.073	417.441	351.932
1.08564	378.781	412.309	426.243	428.258	351.726
1.07752	380.031	421.547	433.73	422.972	356.015
1.06907	381.632	415.915	430.278	433.76	356.464
1.06113	386.372	425.623	441.018	430.805	360.092
1.05307	384.941	420.611	437.03	436.825	362.019
1.04524	390.594	430.311	447.426	440.872	364.122
1.03694	388.581	424.305	443.35	440.653	370.451
1.02944	395.698	429.32	451.571	448.32	370.141
1.02152	394.527	430.804	451.875	441.996	376.216
1.01386	400.982	432.168	453.979	454.11	374.912
1.00592	400.69	440.474	460.221	449.011	382.332
0.998639	405.683	436.329	455.904	457.607	380.737
0.990878	398.378	447.978	465.986	454.337	387.276
0.983565	400.845	444.049	457.299	457.713	386.564
0.975909	402.472	455.071	462.167	459.321	392.109
0.968499	405.436	452.386	456.629	449.173	394.575
0.961391	407.064	458.663	465.46	458.543	397.495
0.954009	410.713	462.772	463.423	452.29	402.041
0.946771	416.256	463.953	466.739	463.53	401.068
0.939671	418.116	471.748	471.837	457.865	408.318
0.932459	427.345	465.998	471.116	464.95	404.813
0.925259	424.772	478.953	481.915	463.682	412.981
0.918405	432.691	471.646	476.391	464.332	408.052
0.91151	432.096	483.079	490.342	469.612	416.95
0.904612	439.992	479.943	485.823	464.551	415.116
0.897655	438.391	485.539	496.601	477.333	421.13
0.890914	448.543	489.34	496.875	472.143	422.627
0.884255	448.604	486.506	502.463	485.221	425.846
0.877537	456.656	495.045	508.505	480.309	432.118
0.870872	459.251	489.27	507.83	489.883	430.037
0.864236	461.754	503.155	519.513	486.247	438.745
0.857736	468.892	495.689	514.308	481.402	433.074
0.851155	467.945	508.666	527.355	488.098	445.209
0.844697	477.168	505.425	523.17	484.02	441.081
0.838324	475.15	514.271	534.634	498.115	453.212
0.832019	488.301	517.156	529.166	492.02	452.354
0.825708	484.762	518.095	532.65	502.667	461.328
0.81946	496.312	526.693	534.826	499.329	463.429
0.813235	493.645	523.371	533.864	508.837	467.16
0.807047	504.36	536.034	540.669	510.936	477.029
0.800993	507.368	529.757	534.377	511.796	474.767
0.794925	512.303	543.328	547.003	523.465	486.795
0.788916	519.566	539.032	541.064	518.766	481.598
0.78293	514.904	547.387	551.713	533.038	493.499
0.777032	525.307	549.113	547.789	528.227	490.364
0.771131	519.171	551.375	556.26	540.18	502.183
0.765309	532.22	561.307	559.328	538.115	501.842
0.75943	524.648	559.342	560.917	545.923	510.946
0.753746	539.599	571.726	564.791	552.255	514.982
0.748066	536.312	567.219	563.051	554.923	516.892
0.742379	544.443	579.336	573.97	568.327	527.397
0.736761	546.769	576.094	570.985	565.766	526.725
0.731052	548.074	583.288	581.524	582.223	537.712
0.725617	558.185	584.143	577.689	578.537	534.18
0.720187	550.506	586.193	590.256	591.37	548.326
0.714738	563.747	594.624	590.795	593.108	545.12
0.709203	551.783	590.78	596.078	599.867	556.945
0.703874	565.669	603.036	600.109	607.319	555.698
0.69858	556.721	596.379	606.059	608.256	564.172
0.693221	568.657	608.7	612.208	621.42	567.657
0.687983	565.018	605.659	610.366	620.065	571.779
0.682863	572.861	615.233	617.249	633.578	578.809
0.677693	578.255	616.82	619.98	632.176	578.919
0.67244	577.169	619.173	630.584	643.684	590.735
0.667511	591.2	626.195	627.611	645.695	588.21
0.662322	582.138	625.29	634.921	649.374	600.459
0.657406	601.343	635.155	636.463	658.5	597.695
0.652427	590.935	631.057	646.68	657.82	608.509
0.647337	610.014	638.903	646.541	667.963	608.329
0.642587	600.284	631.84	649.775	664.034	618.294
0.637635	614.675	639.2	654.093	678.059	621.503
0.632936	613.045	637.054	661.248	678.265	627.099
0.627995	620.952	638.506	667.97	688.302	629.833
0.623225	624.972	641.754	665.656	693.124	634.927
0.618545	624.168	641.062	675.348	697.361	639.344
0.613928	639.229	646.873	673.407	708.224	642.157
0.609207	631.406	643.072	686.921	703.651	648.863
0.604573	648.775	652.706	680.196	716.467	649.36
0.600008	641.166	648.473	691.532	712.281	656.979
0.59557	660.211	657.088	687.166	727.216	656.184
0.590904	653.279	655.385	695.952	721.469	667.488
0.586582	664.458	663.315	693.827	731.233	663.863
0.582057	666.882	662.352	693.317	730.346	676.879
0.577789	667.068	666.756	699.307	732.851	671.499
0.573232	677.556	672.077	696.242	734.866	682.423
0.56893	673.683	676.154	712.249	726.402	678.102
0.564762	692.516	679.516	702.363	729.702	686.867
0.560217	680.282	681.657	720.666	727.779	683.997
0.556161	696.936	690.364	711.198	739.049	693.627
0.551994	688.061	689.515	725.409	738.179	695.391
0.547644	697.621	697.074	726.169	746.027	695.012
0.543648	698.884	695.087	730.699	748.574	698.099
0.539534	707.002	704.197	737.872	754.984	692.795
0.5353	710.217	702.453	735.911	759.253	707.173
0.531349	715.863	709.853	752.651	765.835	699.011
0.527392	726.121	712.361	740.505	772.387	716.367
0.523264	728.278	716.229	757.27	774.334	708.958
0.519369	739.456	723.391	742.531	782.88	726.237
0.515446	738.506	722.79	761.793	783.264	720.76
0.511514	756.184	733.018	754.777	793.84	732.859
0.507627	755.029	727.43	765.04	796.944	732.877
0.503811	771.025	736.858	767.495	803.536	737.754
0.500011	768.751	727.35	767.412	809.14	741.959
0.496237	779.528	738.574	784.338	813.849	738.071
0.492437	780.502	737.709	774.071	818.035	750.424
0.488702	789.947	742.808	792.564	820.749	740.612
0.485016	793.746	751.587	776.5	826.986	759.786
0.481361	807.727	749.189	799.865	826.282	747.257
0.477728	811.533	764.247	792.074	834.775	766.986
0.474092	818.703	755.726	803.394	832.503	758.688
0.470497	820.668	773.411	803.249	841.362	774.629
0.46694	826.106	766.879	806.239	841.928	773.484
0.463387	836.722	780.274	821.89	848.019	777.172
0.459875	838.924	779.068	814.492	852.433	785.125
0.456429	852.969	783.15	833.257	854.64	783.756
0.452955	852.768	790.221	819.601	862.173	798.643
0.449562	870.864	785.938	844.094	859.399	790.519
0.446124	867.198	802.196	832.652	872.991	809.383
0.44279	887.495	793.45	848.6	865.468	800.128
0.439381	884.481	811.012	846.358	883.513	817.26
0.436064	906.45	802.112	855.856	879.214	807.642
0.432731	907.663	820.886	864.361	884.626	821.778
0.429482	920.652	816.665	854.776	890.223	821.411
0.426247	930.27	825.235	879.385	893.417	828.379
0.422986	934.334	833.356	868.861	908.828	835.369
0.419828	953.192	826.268	894.872	902.697	829.38
0.416619	946.969	845.441	882.089	923.859	842.673
0.413496	969.549	829.751	903.276	916.913	835.595
0.410321	956.237	854.87	901.268	939.884	854.041
0.407234	985.884	840.799	909.778	935.877	844.891
0.404129	975.321	860.005	916.92	951.517	861.887
0.401083	1000.2	853.911	915.51	955.19	856.328
0.398051	996.79	866.659	935.029	961.988	870.99
0.395026	1010.57	871.507	923.508	978.503	867.286
0.392074	1019.84	868.511	945.421	977.495	880.035
0.389079	1019.48	886.106	933.982	1000.8	877.955
0.386171	1041.65	875.221	953.333	993.754	888.641
0.383177	1011.63	899.719	952.038	1018.68	891.286
0.380312	1038.57	882.567	962.504	1017.37	896.196
0.377411	1016.71	909.435	966.901	1032.64	904.275
0.374556	1045.91	899.832	969.273	1043.01	905.962
0.37173	1034.58	912.609	985.763	1050.9	915.095
0.368896	1055.07	920.191	975.69	1072.7	912.227
0.36614	1059.94	919.009	995.232	1068.71	925.821
0.363323	1070.06	937.701	985.859	1100.82	922.027
0.360596	1082.21	928.761	1011.56	1094.64	936.838
0.357846	1076.63	959.771	1008.67	1125.49	928.567
0.355164	1104.74	941.955	1022.5	1125.37	944.019
0.352461	1086.96	971.685	1023.2	1150.12	935.258
0.34981	1124.17	961.407	1034.79	1160.16	953.409
0.34713	1106.17	981.552	1040.49	1173	950.995
0.344511	1137.69	981.644	1042.33	1196.63	962.324
0.341913	1127.68	981.974	1050.91	1190.13	964.271
0.339328	1147.86	1001.92	1043.92	1226.12	969.503
0.336769	1149.34	986.379	1059.95	1215.55	981.249
0.334203	1154.35	1017.17	1055.97	1242.4	979.392
0.331668	1174.59	997.539	1071.59	1226.2	998.655
0.329128	1163.68	1030.35	1070.79	1231.79	987.596
0.326704	1190.61	1015.68	1086.48	1225.67	1012.14
0.324181	1168.01	1041.79	1089.65	1211.91	997.268
0.321749	1199.51	1043.18	1102.76	1223.09	1025.38
0.319258	1183.07	1045.02	1103.39	1194.17	1010.38
0.316887	1210.53	1068	1110.01	1215.58	1030.93
0.314512	1197.75	1052.95	1117.16	1184.54	1021.33
0.312104	1215.44	1091.06	1120.71	1202.11	1035.48
0.309777	1222.43	1067.9	1129.79	1187.01	1041.52
0.30737	1224	1105.4	1125.26	1194.69	1040.03
0.305085	1237.17	1091.29	1138.98	1197.34	1061.81
0.302761	1226.77	1118.29	1136.55	1190.22	1048.13
0.300455	1255.59	1120.77	1156.59	1214.55	1078.01
0.298154	1240.77	1123.12	1148.14	1195.96	1058.68
0.295965	1268.28	1152.02	1169.88	1227.49	1090.92
0.293666	1253.79	1134.41	1164.86	1209.52	1075.84
0.291464	1280.99	1173.57	1182.97	1240.4	1103.65
0.289274	1275.55	1150.3	1182.49	1236	1098.51
0.28707	1287.76	1188.91	1187.24	1250.87	1110.54
0.284912	1295.4	1176.83	1204.59	1272.91	1120.03
0.282744	1298.63	1201.52	1195.28	1268.9	1122.61
0.280639	1324.36	1209.32	1223.09	1307.05	1141.84
0.278467	1310.85	1212.3	1204.36	1295.67	1129.49
0.276369	1340.64	1234.2	1239.4	1339.06	1159.97
0.274258	1328.94	1218.25	1226.57	1327.76	1141.53
0.272214	1363.87	1255.2	1255.95	1370.08	1175.12
0.270112	1352.68	1228.75	1245.02	1374.96	1157.31
0.268103	1382.22	1259.47	1264.95	1397.3	1188.11
0.26605	1381.57	1239.87	1267.66	1431.76	1178.17
0.264025	1399.14	1252.29	1265.99	1430.51	1196.94
0.262055	1400.49	1249.51	1285.84	1486.98	1202.06
0.260066	1408.24	1242.37	1272	1475.09	1208.77
0.258116	1415.91	1257.68	1299.11	1532.14	1228.25
0.256134	1418.65	1238.2	1281.9	1525.64	1219.91
0.2542	1434.69	1267	1318.22	1569.07	1251.7
0.25229	1436.3	1240.17	1302.96	1582.38	1233.23
0.250353	1458.09	1269.46	1327.5	1604.28	1264.11
0.24846	1459.11	1253.94	1331.41	1647.63	1250.88
0.246614	1477.95	1272.26	1335.24	1636.11	1275.24
0.244708	1419.63	1270.49	1358.04	1691.08	1269.76
0.242875	1450.65	1268.39	1338.3	1671.17	1289.41
0.241017	1444.84	1291.19	1382.98	1727.8	1287.54
0.239209	1473.82	1272.62	1351.73	1707.24	1298.42
0.237377	1469.37	1299.54	1399.14	1730.69	1309.59
0.235581	1497.38	1281.47	1373.27	1728.7	1309.62
0.233816	1494.51	1317.45	1409.49	1721.07	1324.74
0.232023	1514.02	1300.26	1401.67	1734	1322.32
0.230298	1519.35	1321.26	1410.11	1692.79	1345.74
0.228534	1528.23	1327.64	1430.42	1713.91	1341.26
0.226828	1547.16	1330.08	1415.14	1660.67	1362.15
0.225079	1542.72	1353.69	1454.95	1692.83	1356.99
0.223399	1574.24	1346.54	1428.69	1653.72	1384.5
0.221691	1553.92	1382.35	1479.69	1666.62	1374.25
0.220009	1592.14	1365.25	1446.11	1661.95	1406.28
0.218339	1578.16	1405.08	1484.66	1650.67	1392.25
0.216692	1611.63	1392.12	1473.72	1680.96	1425.31
0.215055	1604.69	1424.58	1496.97	1649.71	1412.2
0.213407	1623.26	1421.7	1502.53	1695.95	1438.97
0.211812	1627.59	1443.03	1494.99	1665.26	1435.05
0.210184	1630.75	1463.87	1529.65	1709.05	1453.55
0.20863	1650.63	1470.75	1500.77	1696.76	1463.01
0.207005	1632.9	1496.43	1554.43	1721.51	1462.91
0.205492	1672.01	1497.17	1514.56	1742.27	1491.48
0.203895	1641.36	1535.03	1568.46	1747.2	1471.04
0.202387	1685.4	1535.38	1548.1	1793.47	1513.47
0.200817	1648.2	1569.15	1578.23	1787.44	1491.51
0.199329	1689.27	1574.68	1581.83	1851.85	1537.63
0.197797	1676.54	1601.62	1581.83	1850.16	1513.32
0.196305	1701.54	1621.06	1612.42	1907.61	1553.89
0.194814	1707.8	1634.12	1583.05	1928.87	1538.71
0.193321	1707.3	1669.84	1637.63	1965.36	1568.01
0.19188	1746.05	1683.19	1595.83	2016.33	1570.22
0.190406	1721.48	1713.1	1651.77	2032.72	1578.15
0.188981	1766.69	1723.59	1617.83	2107.1	1607.63
0.187532	1730.54	1768.92	1668.32	2114.88	1585.3
0.18613	1783.04	1788.74	1664.07	2203.52	1633.01
0.184714	1750.28	1819.89	1677.41	2214.28	1600.58
0.183311	1790.25	1841.25	1699.23	2289.82	1656.93
0.181937	1772.95	1866.79	1688.04	2322.08	1622.02
0.180546	1798.2	1905.88	1733.19	2373.79	1671.84
0.179198	1811.61	1930.05	1702.19	2440.78	1656.13
0.17782	1808.33	1969.8	1760.11	2464.27	1679.98
0.176498	1851.94	1985.45	1730.01	2561.49	1687.98
0.175138	1815.87	2040.47	1777.2	2570.79	1694.31
0.173847	1884.42	2058.42	1767.93	2673.56	1722.31
0.172498	1846.76	2120.66	1792.31	2680.48	1708.02
0.171206	1894.77	2131.85	1808.89	2767.41	1755.31
0.16988	1867.02	2196.94	1801.46	2796.83	1727.08
0.168615	1914.73	2213.86	1845.76	2843.36	1779.04
0.167336	1914.77	2268.61	1818.83	2904.77	1744.53
0.166056	1929.06	2297.96	1872.16	2925.78	1798.3
0.164825	1953.36	2332.6	1839.13	2996.42	1767.33
0.163541	1945.11	2384.31	1897.48	2991.02	1806.18
0.162347	2006.63	2405.04	1872.62	3061.46	1798.86
0.161068	1975.69	2478.91	1911.12	3056.02	1811.47
0.159888	2048.35	2479.31	1913.37	3091.25	1827.65
0.15865	2007.58	2560.41	1932.11	3069.33	1818.37
0.157464	2072.7	2570.69	1948.52	3064.81	1859.42
0.156261	2060.99	2630.09	1952.1	3057.4	1838.91
0.155076	2102.83	2654.56	1985.84	2990.77	1895.12
0.153914	2111.98	2696.14	1981.77	2972.15	1869.8
0.152737	2119.28	2740.7	2019.93	2885.83	1916.12
0.151595	2161.56	2744.28	2004.94	2850.58	1908.61
0.15043	2147.28	2797.14	2049.15	2780.28	1939.11
0.149319	2213.49	2773.72	2038.09	2734.18	1945.48
0.148145	2184.91	2829.34	2074.72	2676.29	1960.63
0.147063	2250.69	2789.78	2072.73	2636.73	1987.14
0.14591	2234.42	2815.46	2096.11	2612.1	1981.63
0.144831	2297.09	2781.65	2112.75	2554.22	2027.86
0.143722	2285.35	2761.21	2134.6	2557.56	2027.6
0.142628	2314	2758.12	2154.3	2507.19	2065.37
0.14156	2335.2	2688.84	2161.85	2528.82	2057.31
0.140475	2348.52	2677.1	2197.6	2502.61	2102.1
0.139426	2380.08	2591.74	2192.9	2521.09	2100.77
0.138342	2359.78	2586.39	2226.86	2530.02	2139.43
0.137333	2410.82	2495.19	2202.27	2548.37	2134.12
0.136265	2395.82	2478.8	2253.01	2590.22	2171.46
0.135253	2446.59	2418.18	2247	2604.65	2181.26
0.134224	2435.69	2383.27	2296.63	2656.17	2204.05
0.133204	2482.38	2367.47	2285.12	2667.6	2223.71
0.132193	2480.68	2308.3	2316.24	2735.26	2245.15
0.131193	2503.69	2331.52	2327.84	2756.87	2280.29
0.130208	2527.65	2262.28	2360.68	2824.91	2297.1
0.129202	2539.14	2311.4	2392.07	2865.7	2337.43
0.12825	2576.76	2257.99	2383.83	2921.83	2341.56
0.12726	2568.66	2301.73	2445.91	2979.69	2381.51
0.126311	2622.15	2281.33	2415.52	3028.44	2389.47
0.125337	2612.07	2294.61	2494.6	3110.34	2435.91
0.124413	2663.98	2333.61	2454.94	3148.96	2445.81
0.123448	2642.77	2310.03	2533.17	3225.55	2487.36
0.122528	2694.11	2392.61	2514.78	3266.56	2504.35
0.121591	2695.42	2353.91	2561.86	3359.99	2544.37
0.120674	2736.4	2458.17	2585.63	3406.02	2579.24
0.119754	2734.65	2435.09	2600.52	3484.05	2587.77
0.118846	2764.83	2536.16	2667.52	3543.17	2637.69
0.117953	2781.03	2554.73	2645.96	3627.87	2636.62
0.117052	2798.33	2611.24	2735.85	3697.17	2715.24
0.116168	2809.57	2691.43	2695.88	3760.56	2703.17
0.115284	2804.03	2714.61	2790.03	3852.83	2772.13
0.114415	2833.87	2821.77	2766.83	3898.65	2778.8
0.113534	2820.67	2811.74	2830.32	3993.34	2847.39
0.112701	2866.77	2964.42	2831.09	4037.32	2858.56
0.111815	2847.7	2951.57	2860.15	4146.13	2914.16
0.110994	2907.11	3062.59	2908.38	4188.9	2948.23
0.110141	2877.86	3105.55	2880.3	4279.68	2973.95
0.109306	2942.28	3183.4	2972.79	4340.37	3038.56
0.108478	2918.01	3281.45	2910.05	4417.51	3026.12
0.107661	2971.34	3303.48	3013.54	4510.4	3115.11
0.106856	2972.93	3437.53	2947.14	4556.65	3081.17
0.106016	3003.8	3438.33	3032.05	4674.17	3178.87
0.105245	3050.59	3610.31	2998.39	4704.64	3163.21
0.104419	3049.48	3606.88	3030.2	4814.7	3236.94
0.103671	3131.48	3735.4	3047.41	4842.23	3255.95
0.102841	3110.09	3796.85	3035.68	4933.3	3295.7
0.102096	3206.39	3861.4	3109.03	4976.73	3360.71
0.101294	3175.35	3978.43	3032.73	5030.44	3359.87
0.100558	3276.34	3988.34	3148.59	5124.47	3453.5
0.0997754	3266.15	4152.31	3066.13	5155.33	3422.93
0.0990287	3351.22	4138.68	3162.6	5257.6	3521.31
0.098277	3371.92	4321.92	3116.47	5264.67	3485.79
0.0975262	3420.01	4312.54	3177.42	5385.33	3555.95
0.0968108	3493.65	4464.79	3181.82	5380.5	3548.3
0.0960483	3510.16	4519.46	3166.87	5464.5	3590.19
0.0953497	3624.6	4613.88	3231.3	5466.59	3630.02
0.0946014	3597.81	4726.66	3183.73	5519.01	3639
0.0939125	3748.59	4732.3	3275.5	5555.58	3724.11
0.093177	3715.04	4904.97	3207.84	5542.93	3687.59
0.0924857	3868.29	4889.46	3326.49	5619.36	3811.23
0.0917828	3842.77	5066.08	3268.68	5556.28	3747.08
0.091076	3982.91	5057.37	3360.75	5613.85	3854.11
0.0904061	4017.32	5191.36	3364	5546.41	3804.79
0.0896942	4071.1	5247.53	3381.8	5568.92	3876.23
0.0890402	4171.73	5317.92	3440.09	5531.06	3878.5
0.0883381	4184.02	5425.57	3432.01	5481.48	3895.95
0.0877031	4337.93	5448.72	3529.02	5462.28	3934.6
0.0869958	4299.11	5598.89	3480.61	5338.7	3907.16
0.0863883	4485.2	5581.75	3607.81	5352.2	4006.25
0.0856964	4458.59	5743.81	3563.98	5201.35	3931.21
0.0850774	4644.82	5714.4	3676.88	5197.05	4043.55
0.0844123	4645.61	5846.21	3676.5	5061.9	3970.66
0.0837647	4774.52	5874.96	3724.58	5025.22	4084.08
0.0831533	4838.15	5931.94	3770.03	4921.09	4028.23
0.0825031	4883.1	6010.93	3786.52	4842.59	4119.76
0.081901	5015.32	5980.85	3897.55	4830.63	4123.52
0.0812563	4989.52	6075.26	3885.7	4718.88	4142.2
0.0806689	5159.55	5987.01	4021.23	4763.31	4191.02
0.0800172	5107.79	6045.79	3994.3	4649.87	4185.58
0.0794474	5312.77	5939.65	4140.52	4713.44	4305.15
0.078815	5285.94	5969.39	4131.42	4649.35	4258.12
0.0782269	5431.52	5894.71	4240.96	4697.5	4402.6
0.0776466	5427.24	5831.15	4262.14	4713.63	4356.21
0.077051	5519.98	5802.6	4350.5	4723.99	4480.19
0.0764759	5567.24	5696.77	4418.82	4831.87	4467.15
0.0758756	5551.3	5723.65	4469.76	4816.22	4548.73
0.0753275	5640.88	5581.15	4574.57	4952.75	4581.58
0.0747236	5561.95	5577.8	4602.22	4925.52	4620.14
0.0741914	5654.22	5465.9	4704.49	5083.97	4716.73
0.0736073	5558.35	5461.85	4719.48	5091.43	4714.15
0.0730697	5644.32	5386.25	4856.58	5190.18	4845.15
0.072506	5532.84	5338.2	4873.34	5277.62	4794.69
0.0719568	5564.34	5304.58	5002.95	5309.2	4916.43
0.0714193	5522.41	5206.88	5035.15	5461.63	4905.86
0.0708654	5534.48	5228.95	5150.82	5452.25	5009.18
0.0703442	5543.76	5110.37	5196.68	5636.01	5008.13
0.0697857	5527.95	5150.66	5298.86	5617.59	5057.06
0.0692826	5611.16	5066.77	5362.85	5800.37	5094.13
0.0687426	5550.14	5106.6	5451.37	5835.22	5144.59
0.0682391	5665.99	5069.17	5541.2	5929.43	5232.76
0.0677022	5597.46	5092.5	5592.61	6043.79	5208.49
0.0672014	5717.69	5126.93	5738.45	6066.07	5328.16
0.0666971	5668.62	5091.97	5767.84	6243.03	5289.39
0.0661719	5754.99	5154.58	5938.39	6220.73	5419.86
0.0656997	5784.53	5106.91	5942.16	6427.52	5387.66
0.0651872	5812.2	5182.32	6113.35	6401.79	5482.58
0.0647034	5888.03	5157.91	6125.05	6570.23	5489.44
0.0641925	5902.64	5237	6274.5	6604.83	5562.4
0.0637315	6011.62	5261.47	6317.78	6705.89	5610.59
0.0632308	6010.14	5335.66	6410.46	6839.16	5667.75
0.0627663	6123.93	5378.82	6515.58	6848.84	5745.42
0.0622701	6112.17	5460.53	6549.47	7040.92	5765.58
0.061821	6215.03	5538.04	6715.59	7001.39	5867.63
0.0613358	6206.49	5601.96	6682.95	7239.43	5878.36
0.0608774	6301.71	5663.61	6881.72	7220.92	5993.73
0.060413	6306.51	5730.36	6833.69	7399.72	5998.13
0.0599577	6402.14	5838.03	6997.53	7462.65	6114.38
0.0595088	6416.54	5895.8	6977.98	7541.24	6113.19
0.0590542	6500	6004.15	7076.89	7723.44	6237.37
0.0586116	6520.79	6061.43	7142.7	7702.95	6224.1
0.0581519	6562.89	6180.6	7151.82	7951.38	6328.08
0.0577187	6596.59	6218.78	7274.92	7906.14	6322.36
0.0572929	6611.15	6362.2	7212.18	8154.97	6394.25
0.0568501	6669.63	6431.15	7368.07	8150.75	6451.34
0.0564146	6647.22	6526.13	7261.86	8310	6482.68
0.0560003	6734.01	6626.38	7397.18	8424.22	6587.87
0.0555627	6688.18	6707.21	7239.98	8489.75	6586.86
0.055155	6784.89	6852.32	7300.55	8681.57	6751.24
0.0547277	6743.48	6892.88	7209.31	8670.13	6693.19
0.054322	6867.53	7061.57	7173	8942.3	6862.92
0.053897	6810.48	7065.82	7155.79	8877.64	6833.77
0.0535051	6937.89	7227.04	7042.95	9114.45	7003
0.0530888	6941.62	7275.17	7130.58	9127.47	7002.69
0.0526876	6998.94	7415.44	6955.76	9306.25	7115.84
0.0522994	7086.14	7515.84	7086.39	9380.27	7207.36
0.0518876	7064.64	7568.12	6874.56	9451.84	7279.9
0.0515138	7206.78	7757.5	7009.93	9624.58	7409.41
0.0510973	7139.29	7769.61	6884.66	9609.97	7398.58
0.0507406	7320.05	7994.23	6924.52	9835.26	7591.69
0.0503258	7256.53	8025.83	6917.4	9785.81	7557.43
0.049979	7459.84	8210.12	6844.67	9988.83	7777.45
0.0495697	7415.33	8269.43	6957.46	9959.53	7757.61
0.0492047	7568.16	8391.85	6822.42	10129.6	7965.79
0.0488384	7599.35	8524.32	6978.98	10207.5	7959.67
0.0484581	7701.08	8586.13	6833.34	10232	8117.19
0.048106	7809.19	8786.88	7017.04	10411.9	8201.03
0.0477141	7792.27	8750.07	6930.09	10347.1	8246.94
0.0473917	8004.16	9004.07	7029.24	10624.8	8390.63
0.0469881	7936.32	9003.59	7041.83	10561.9	8369.25
0.046682	8181.41	9237.57	7066.76	10770.9	8595.62
0.0462831	8098.38	9257.43	7207.12	10758.5	8509.64
0.0459649	8353.99	9414.23	7182.07	10891	8755.86
0.0455975	8291.87	9545.04	7362.97	11034.7	8683.48
0.0452567	8470.69	9595.74	7284.02	11048.8	8908.51
0.0449291	8522.39	9793.32	7512.14	11252.6	8916.32
0.0445631	8587.45	9780.64	7460.5	11209.2	8980.6
0.0442579	8761.5	10043.4	7657.99	11454.3	9082.08
0.0438797	8707.34	9998.99	7665.84	11435.4	9045.86
0.0435915	8978.38	10254.8	7798.7	11637.4	9237.82
0.0432232	8853.61	10254.5	7898.9	11674.7	9134.9
0.042932	9163.86	10441.3	7951.64	11786.3	9371.66
0.0425769	9044.9	10560.7	8129.86	11956.8	9241.79
0.0422765	9315.41	10620.5	8113.97	11963.7	9464.33
0.0419444	9252.54	10835.6	8346.67	12168.1	9409.46
0.0416267	9440.57	10783.7	8336.45	12122.5	9568.29
0.0413264	9462.08	11091	8519.01	12381.1	9591.54
0.0409898	9527.87	11001.5	8513.76	12387.8	9619.59
0.0407084	9651.03	11286.3	8687.95	12590	9794.9
0.0403653	9584.78	11251.7	8749.27	12656.4	9733.44
0.0401022	9852.5	11475.4	8876.12	12759.8	9962.85
0.0397546	9708.44	11546	8969.17	12942.3	9836.93
0.0394877	9981.65	11634.9	9045.27	12987.5	10106.3
0.0391653	9850.22	11821.1	9164.67	13197.9	9950.83
0.0388883	10083.7	11735.7	9230.78	13197.9	10154.3
0.0385847	10025.9	12039.2	9370.97	13448.6	10097.4
0.0382814	10195.1	11921	9390.27	13537.8	10188.1
0.0380112	10182.3	12238.7	9541.54	13697	10244
0.0377018	10236.7	12173	9555.98	13836.2	10176
0.0374416	10410.1	12387.6	9714.91	13921.5	10364.2
0.0371283	10328.6	12455.1	9698.12	14152.2	10200.3
0.0368786	10580.3	12522.2	9860.25	14179.2	10477.5
0.0365773	10459.4	12713	9845.47	14458.2	10322.1
0.0363195	10765.1	12607.5	9971.25	14453.8	10565.6
0.0360207	10667.7	12900.6	10032.4	14704.6	10494.9
0.0357706	10937.5	12679.3	10096.1	14776.2	10660.3
0.0354842	10910.3	12973.4	10195.3	14953	10703.7
0.0352143	11098.7	12859.5	10214.3	15111.8	10810.2
0.0349604	11208	13032.5	10369.4	15236.1	10916.7
0.0346808	11274.4	13022.6	10313.5	15463	10949
0.0344372	11441.5	13045.4	10556.3	15558	11157.8
0.0341538	11431.8	13268.6	10480.3	15793.6	11071.3
0.0339174	11725.3	13149.6	10721.7	15796.1	11389.6
0.0336406	11647.6	13460.8	10674.3	16072.5	11316.1
0.0334033	11930	13278.9	10910.9	16119.1	11625
0.0331413	11867.2	13598	10918.9	16335.2	11571.9
0.0328864	12109.7	13407.1	11041	16464.2	11827.8
0.0326433	12119.9	13618.9	11174.3	16614	11902.7
0.0324005	12344.6	13668.5	11199.2	16833.2	12034
0.0321448	12374.7	13679	11446.2	16905.7	12184.1
0.031902	12464	13874.3	11325.9	17155.2	12225.1
0.031669	12654	13804.7	11682.2	17244.7	12455.4
0.0314146	12715.5	14113.5	11556.5	17490.3	12468.9
0.0311958	12985.4	13932.2	11911.2	17545.1	12681.8
0.0309386	12998.2	14304.7	11863.9	17810.6	12695.6
0.0307253	13244.7	14218	12106.5	17904.7	12927.1
0.0304806	13276.1	14488.9	12230.1	18096.2	12979.6
0.0302581	13536.2	14500.2	12301.4	18245.8	13190.3
0.0300131	13560.3	14570.6	12638.7	18405.2	13230.3
0.0298025	13778.4	14803.8	12455.5	18632.9	13472.7
0.029563	13847.7	14697.1	12922.6	18727.8	13528.7
0.0293496	14045.7	15036.3	12756	18994.8	13672.1
0.0291207	14131.5	14885.3	13201.8	19069.2	13811.3
0.0289051	14240.9	15230	13113.6	19345.4	13934
0.0286831	14337.1	15122.1	13443.5	19448.3	14117
0.0284637	14460.9	15384.4	13539.6	19726	14226.8
0.0282597	14590.3	15421.6	13662.6	19817.5	14488.7
0.0280297	14707.8	15489.3	13910.5	20043.1	14538.7
0.0278423	14904.7	15720.8	13895.8	20229.1	14804.8
0.0276008	14920.7	15686.1	14351.1	20379.4	14790
0.0274158	15254.8	16046.4	14173.3	20641.2	15073.9
0.027187	15176.8	15908.2	14658.2	20708.8	15122.7
0.0270065	15514.8	16307.1	14572.8	21058.1	15388
0.0267753	15452.7	16195	14979.3	21071.4	15451.4
0.0265925	15813.9	16512.9	14974	21413.6	15622.3
0.026385	15771.2	16521.6	15204.4	21457.6	15844.1
0.0261804	16052.1	16652.9	15429.7	21745.6	15906.7
0.0259926	16159.8	16802	15483.7	21877.8	16160.6
0.0257725	16294.3	16763.5	15837	22034.7	16137.4
0.025611	16505.3	17089.6	15731.6	22371	16517.9
0.025379	16521.8	16976.8	16236.4	22432.4	16400.7
0.0252353	16921.3	17356.6	16104.8	22802.5	16850.1
0.0249934	16795.5	17264.4	16587.7	22844.6	16769.1
0.0248481	17252.5	17553.4	16557.2	23223.7	17154.3
0.0246272	17136.3	17616.8	16857.9	23299.4	17089
0.0244567	17558.8	17748.1	17014.6	23604.1	17306.7
0.02427	17506.2	17942.8	17083.3	23805.1	17417.4
0.0240767	17820.2	17956.6	17444.7	23947.5	17532.3
0.0239122	17947.6	18262.8	17364.4	24261.7	17820.7
0.0237032	18064.5	18189.9	17847.3	24325.2	17738.1
0.0235644	18419.4	18570	17750.7	24759.5	18224.9
0.0233384	18321.9	18495.3	18185.2	24731	18062.5
0.0232141	18833.8	18826.5	18259.6	25191.5	18519.2
0.0229929	18663.8	18845.3	18542.2	25262	18308
0.0228525	19214.3	19137	18623.2	25548.2	18708.9
0.0226528	19073.3	19310.8	18827.3	25779.1	18619.4
0.0224932	19483.3	19445.5	19094.5	25916.4	18803.9
0.0223303	19498.3	19722.9	19110.6	26297.6	18949.4
0.0221344	19815.6	19758	19486.9	26303.9	18865.4
0.0220078	19981.2	20070.6	19440.4	26772.8	19259.6
0.0218002	20053.1	20116.5	19809.9	26771.7	19063.2
0.021673	20446.5	20450.8	19812	27212.3	19566.1
0.0214671	20337.3	20493.2	20133.7	27250.1	19305.8
0.0213436	20979.1	20851.8	20180.8	27592.6	19851.4
0.0211492	20732.4	20916.8	20445.2	27841.8	19673.5
0.0210181	21310	21179.1	20587.8	27952.3	19996.5
0.0208385	21137.4	21312.2	20704	28391.5	20005.6
0.0206847	21675.6	21529.2	20940.2	28372.8	20189.5
0.0205343	21611	21732.2	21031.2	28884.1	20459.1
0.0203685	21875.5	21922	21348.1	28857.7	20412.5
0.020235	22135	22138.1	21415.6	29325.8	20881.4
0.0200483	22148.1	22315.9	21630.9	29359.3	20757.8
0.01994	22676	22637.5	21716.6	29657.5	21261.3
0.0197423	22506.8	22766.8	22074.5	30008	21076.4
0.0196327	23130.1	23067	22138.6	29995.7	21553.4
0.0194461	22958.6	23187.3	22478.4	30565.1	21457.3
0.019338	23593.9	23447.9	22573.1	30402.5	21771.9
0.0191605	23481	23634.7	22870.1	30989.2	21916.2
0.0190329	23880.6	23876.9	22990.4	30802.1	21971.2
0.0188807	23861.2	24134.2	23185.1	31274.9	22379.2
0.0187399	24158.3	24306.8	23313.8	31372.1	22290
0.018609	24360.6	24677.9	23468.9	31553.6	22814.4
0.0184457	24433.1	24783.3	23746.8	31849.2	22695.4
0.0183293	24979.5	25210.3	23853.2	31804.9	23214.9
0.0181703	24785.5	25205.7	24261.4	32292.5	23113.3
0.0180554	25387.5	25612.9	24170.5	32155.9	23532.9
0.0178914	25223	25759.2	24633.7	32680.8	23595.1
0.017778	25767.9	26057.7	24522.6	32502.9	23821.5
0.0176303	25653.1	26278.3	24915.7	32898.4	24113.7
0.0175056	26060.4	26456.5	24871.9	33024.8	24234.1
0.0173747	26043.7	26835.1	25200.6	33091.9	24677.5
0.0172301	26246.2	26894	25439.7	33177.3	24549.2
0.0171181	26558.7	27383.2	25502.1	32946.3	25196.6
0.0169692	26627.3	27374.6	25965.2	33397.6	25088.2
0.0168598	26983.6	27842.7	25867.2	33071.7	25598.7
0.0167156	26991.4	27958.1	26489.1	33439.3	25553.4
0.0165988	27387.4	28313.1	26311.8	33086.9	25895.9
0.016457	27387.1	28568.7	26873.1	33240.9	26127.6
0.0163601	27798.1	28632.5	26796.2	33202.4	26355.8
0.0162146	27794.9	29196	27270	33081.9	26634
0.0161026	28169.9	29138.7	27354.2	33470.4	26767
0.0159761	28180.1	29780	27632.9	33114.3	27084.9
0.0158527	28587	29622.9	28025.6	33637.8	27194.3
0.0157422	28534	30263.3	28026.3	33284.9	27587.6
0.0156119	28940.6	30251.8	28636.9	33805.7	27636.2
0.0154987	29041.5	30724.3	28504.5	33679.7	28090.2
0.0153825	29272	30926.2	29220.7	33962.7	28104.3
0.01526	29420.6	31063	29037.1	34213.7	28571
0.0151478	29598.1	31661.3	29777.7	34166.9	28547.5
0.0150317	29788.8	31499.5	29698.6	34693.9	29004.2
0.0149173	29806.8	32291.4	30125.5	34407	29029.8
0.0148173	30121	32033.5	30460.9	35078.7	29433.1
0.0146836	30054	32801.2	30529.2	34796.9	29432
0.0145911	30500.8	32776	31167.2	35345.8	29746.3
0.0144635	30339.1	33297.1	30987.6	35322.5	29993.5
0.0143795	30908.7	33523.4	31766.2	35551.2	30114
0.0142378	30727.9	33797.6	31537.6	35874	30469
0.0141603	31393.6	34293.5	32333.5	35792.2	30554.6
0.0140353	31200.9	34227.1	32190.7	36435.8	31084.6
0.0139297	31590.6	34974.4	32724.2	36071.2	30950.1
0.013838	31637.3	34720	32861.6	36845.1	31657.6
0.0137071	31793.6	35516.1	33020	36526.8	31544.5
0.0136358	32140.5	35409.2	33614.1	37178.5	32100.1
0.0134975	32028	36024.5	33556.4	37262.7	32043.1
0.0134326	32656.6	36399.9	34324.2	37529.6	32499.1
0.0132957	32372.3	36646.1	33993	38009.3	32778.3
0.0132315	33168	37185	34856.3	37872.5	32930.7
0.0130952	32858.5	37121.7	34735.6	38691	33343.7
0.0130182	33618.9	37922	35376.7	38462.8	33381.1
0.012914	33356.4	37736.2	35442.3	39297.9	33978.3
0.0128135	33915.5	38557.9	35767.4	39141.7	33751.7
0.0127277	33913.5	38367.2	36206.1	39638.8	34452.9
0.0126083	34278.4	39087.6	36182.9	39841.5	34135.1
0.012544	34683.8	39305.5	36874	40097.1	34817.1
0.0124053	34584.6	39609.1	36785	40757.7	34699
0.0123609	35268.4	40206	37624.3	40531.9	35221.9
0.0122256	35030.4	40099.1	37428.2	41450.5	35362.2
0.0121732	35958.4	41120.4	38105.2	41216.7	35610.3
0.0120467	35531.7	40892.3	38167.9	42079.2	36073.8
0.0119711	36408.6	41805.4	38600.2	41998.8	35976.2
0.0118856	36060.4	41609.9	38900.6	42537.5	36786.5
0.0117796	36759.8	42402.4	39089	42916.7	36425.3
0.0117131	36805.4	42528	39612.5	42997.8	37401.3
0.0115899	37117.3	42811.8	39731	43764.1	36717.8
0.0115409	37579.9	43432.3	40501.3	43599.5	37559.1
0.0114106	37492	43412.6	40399.9	44477.7	37331.6
0.0113756	38339.1	44389.1	41177.3	44250.6	37795.8
0.0112427	38056.8	44103.2	41281.8	45011.5	37977
0.0111857	39092.7	45142.7	41866.1	45109.5	38057.9
0.0110832	38610.4	44905.6	41978.1	45481	38775
0.0110194	39616.2	45791	42494.2	45929.3	38417.5
0.0109188	39355	45968.7	42820.8	45895.6	39305.5
0.0108378	40022.3	46290	43034.3	46635.2	38867.4
0.0107726	40130.5	46901.1	43762.6	46458.8	39867.1
0.0106607	40435.5	46874.3	43723.7	47292.8	39509.5
0.0106195	41037.2	47952.3	44267.4	47079.1	40270.2
0.0104958	41030.3	47623.5	44392.7	47697.7	40419.2
0.0104542	41907.9	48788.1	45048.5	47811	40887.8
0.0103448	41483.3	48528.5	45229.6	48099.6	41356.8
0.0102964	42492.1	49481.6	45771.6	48632.8	41384.2
0.010193	42201.2	49586.9	46031.2	48627.5	42314.5
0.0101245	42690.4	50034.8	46535.1	49529	41916.8
0.0100564	42435.7	50694	46703.9	49169.4	43075.1

## Sheet: Degradation
Day	Acellular-Medium			Cellular-Medium			Acellular-Enzyme			Cellular-Enzyme
0	100	1.64817e-12	3	100	1.83669e-12	3	100	1.23711e-12		100	0
1	73.9924	7.65685	3	74.2454	9.18441	3	2.36764	3.13062		53.5674	7.38388
4	37.8178	26.9552	3	60.198	13.3112	3				0	2.5728
7	26.8425	20.2567	3	40.1771	8.78443	3
14	2.67413	5.34826	3	27.4845	12.8224	3
21	1.86567	3.73134	3	30.4535	4.2728	3

## Sheet: Mechanical-Young's Modulus
	Cellular			Acellular
D0	14	0.450925	3	11.8	0.619139	4
D7	13.15	0.967385	6	12.3	3.5	2
D14	11.325	1.34436	4
D21	12.2333	2.19355	3

## Sheet: Mechanical-Strain to failure
	Cellular			Acellular
D0	27.95	2.05	3	35.175	2.97668	4
D7	39.2333	3.57292	6	22.5	1.6	2
D14	41.9667	6.80947	4
D21	36.4667	6.49974	3

## Sheet: Mechanical-max load
	Cellular			Acellular
D0	0.0716667	0.0112151	3	0.07375	0.01034	4
D7	0.0608333	0.00883711	6	0.049	0.0212132	2
D14	0.0585	0.0118919	4
D21	0.0513333	0.0148717	3

## Sheet: gel viability
D0	D1	D4	D7	D14	D21
78.6017	86.5169	76.0417	96.7033	96.2441	97.8102
89.2473	90.8163	84.9206	97.7401	98.6014	98.4375
90.5138	87.619	74.7664	98.3471	98.7578	98.8095

## Sheet: composite viability
Center of gel	Near PCL
97.3635	80.8824
96.5812	63.6364
92.5926	58.3333

## Sheet: MTS-1mm
Day	1.5% TGase			2.5% TGase
0	100	16.0984	3	81.0696	15.1694	3
1	88.5693	15.9029	3	64.7948	16.369	3
4	111.231	16.9679	3	105.579	16.043	3
7	117.443	19.7169	3	100.457	16.7963	3
14	133.862	17.2154	3	129.658	15.7474	3
21	143.923	17.3865	3	138.286	18.4877	3

## Sheet: MTS-2mm
Day	1.5% TGase			2.5% TGase
0	100	17.1904	3	92.2335	2.88904	3
1	112.856	7.79302	3	98.0986	7.79302	3
4	118.74	3.42257	3	98.1497	5.23697	3
7	120.045	10.8391	3	102.772	6.81298	3
14	150.553	5.2994	3	132.084	17.1507	3
21	156.339	4.03746	3	134.362	12.1483	3

[truncated: 9 more sheets: BSA release, BSA retention, BSA release fast, qPCR-COL1, qPCR-AGG, qPCR-SOX9, qPCR-SCX, qPCR-mech-SOX9, qPCR-mech-AGG]
